# Supplementary material for: Altered Gray Matter Volume and Functional Connectivity in Patients With Vestibular Migraine
Source: PubMed Central journal article supplement (PMC8297163; doi:10.3389/fnins.2021.683802), 2021-07-08
Supplement: Data_Sheet_1.pdf [file Data_Sheet_1.pdf]

Supplementary Figure 1

Nonparametric test: a

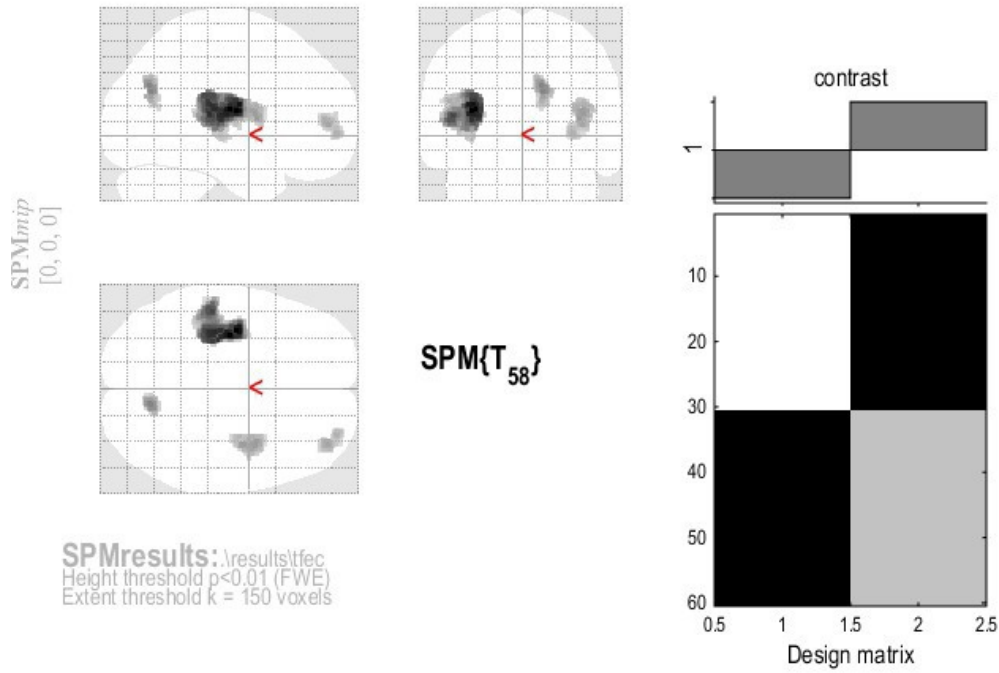

SPMresults:\results\fec  
Height threshold  $p < 0.01$  (FWE)  
Extent threshold  $k = 150$  voxels

Statistics: *nonparametric p-values adjusted for search volume*

| $k_E$ | peak-level            |                       |      | $T$   | $p_{\text{uncorr}}$ | mm mm mm |    |  |
|-------|-----------------------|-----------------------|------|-------|---------------------|----------|----|--|
|       | $p_{\text{FWE-corr}}$ | $q_{\text{FDR-corr}}$ |      |       |                     |          |    |  |
| 1665  | 0.000                 | 0.002                 | 7.20 | 0.000 | -36                 | -11      | 14 |  |
|       | 0.000                 | 0.002                 | 6.78 | 0.000 | -32                 | -20      | 11 |  |
|       | 0.000                 | 0.002                 | 6.74 | 0.000 | -35                 | -26      | 15 |  |
| 179   | 0.001                 | 0.002                 | 5.93 | 0.000 | 12                  | -68      | 26 |  |
|       | 0.007                 | 0.002                 | 5.22 | 0.000 | 11                  | -63      | 17 |  |
| 270   | 0.001                 | 0.002                 | 5.72 | 0.000 | 38                  | -6       | 14 |  |
|       | 0.002                 | 0.002                 | 5.70 | 0.000 | 36                  | 3        | 9  |  |
|       | 0.003                 | 0.002                 | 5.51 | 0.000 | 39                  | 3        | 17 |  |
| 235   | 0.002                 | 0.002                 | 5.63 | 0.000 | 38                  | 50       | 5  |  |
|       | 0.003                 | 0.002                 | 5.54 | 0.000 | 32                  | 57       | 0  |  |
|       | 0.007                 | 0.002                 | 5.22 | 0.000 | 36                  | 56       | 12 |  |

table shows 3 local maxima more than 8.0mm apart

Degrees of freedom = [1.0, 58.0]

FWHM = 11.8 12.7 12.7 mm mm mm; 7.9 8.5 8.5 (voxels)

Volume: 1482600 = 439289 voxels = 641.9 resels

Voxel size: 1.5 1.5 1.5 mm mm mm; (resel = 565.84 voxels)

Permutations = 5000

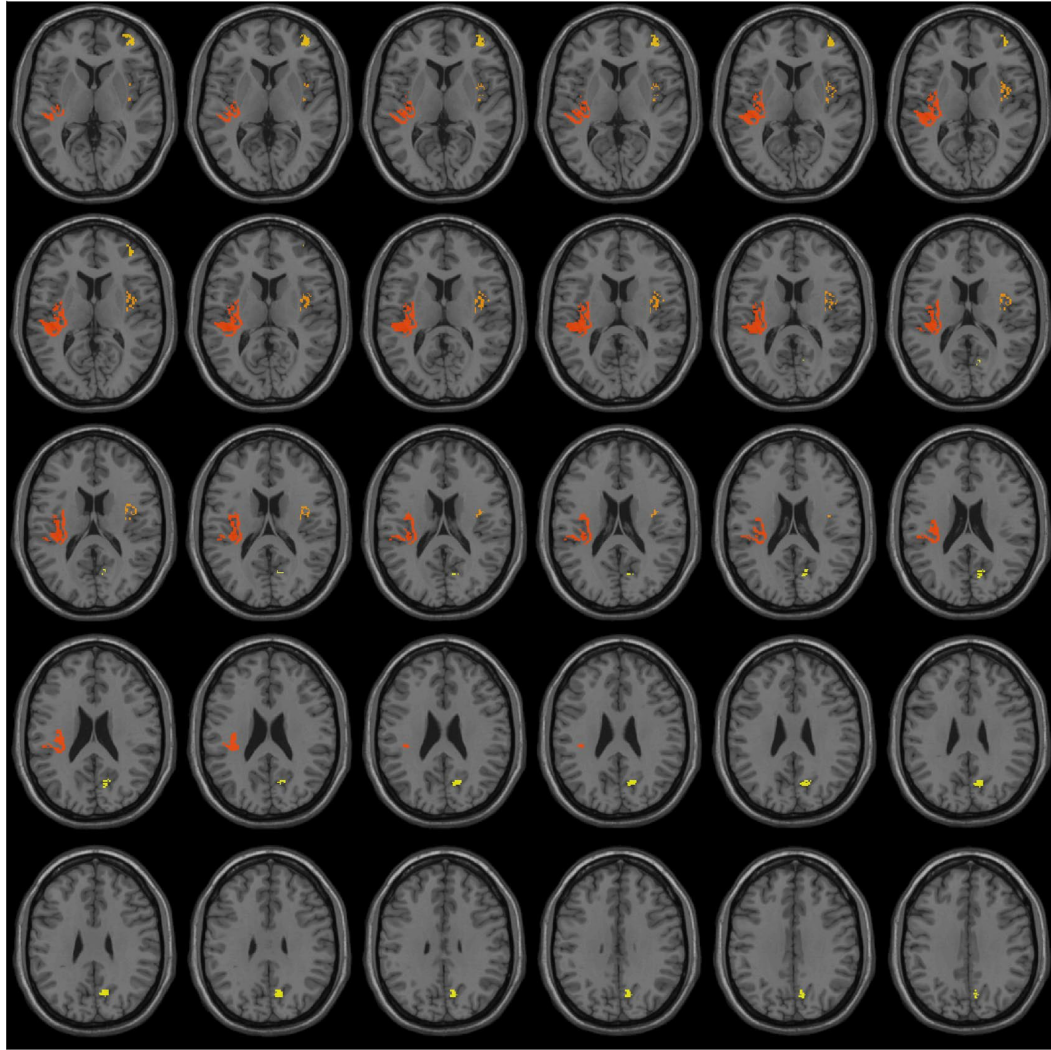

Supplementary Figure 2
